# Supplementary material for: Succinate is an inflammatory signal that induces IL-1β through HIF-1α
Source: Springer Nature journal article supplement (doi:10.1038/nature11986), 2013-03-22
Supplement: 41586_2013_BFnature11986_MOESM24_ESM.pdf [file 41586_2013_BFnature11986_MOESM24_ESM.pdf]

S1

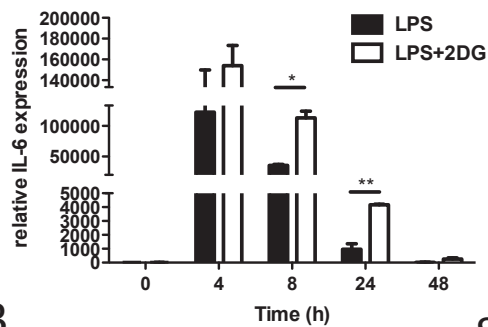

S2

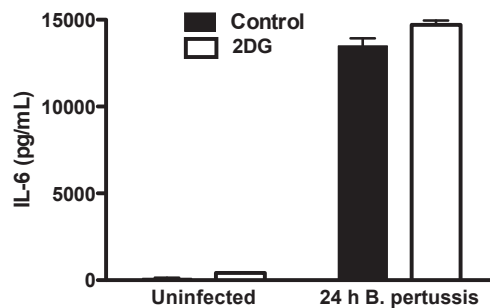

S3

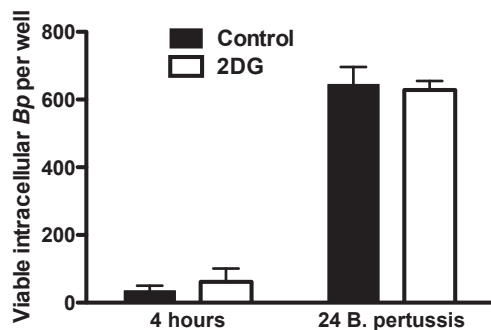

S4

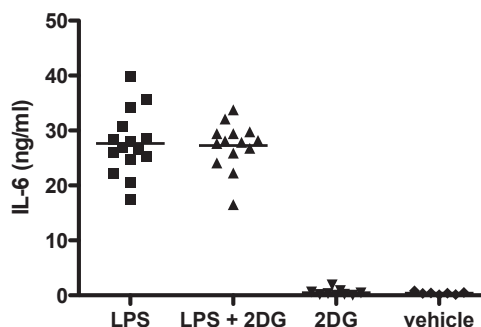

S1. LPS-or S2. *B. pertussis*- induced IL-6 in BMDMs pretreated  $\pm$  2DG (1mM) for 3 h. S3. Bacterial CFU of *B. pertussis* treated BMDMs were calculated following four days incubation at 37°C . S4. IL-6 in serum of mice i.p. injected  $\pm$  2DG (2g/kg) or PBS for 3 h, then LPS or PBS solution for 1.5 h. LPS n=15; LPS+2DG n=14; 2DG n=8; vehicle n=5. Error bars  $\pm$  s.e.m, \*  $p < 0.05$ .

S5

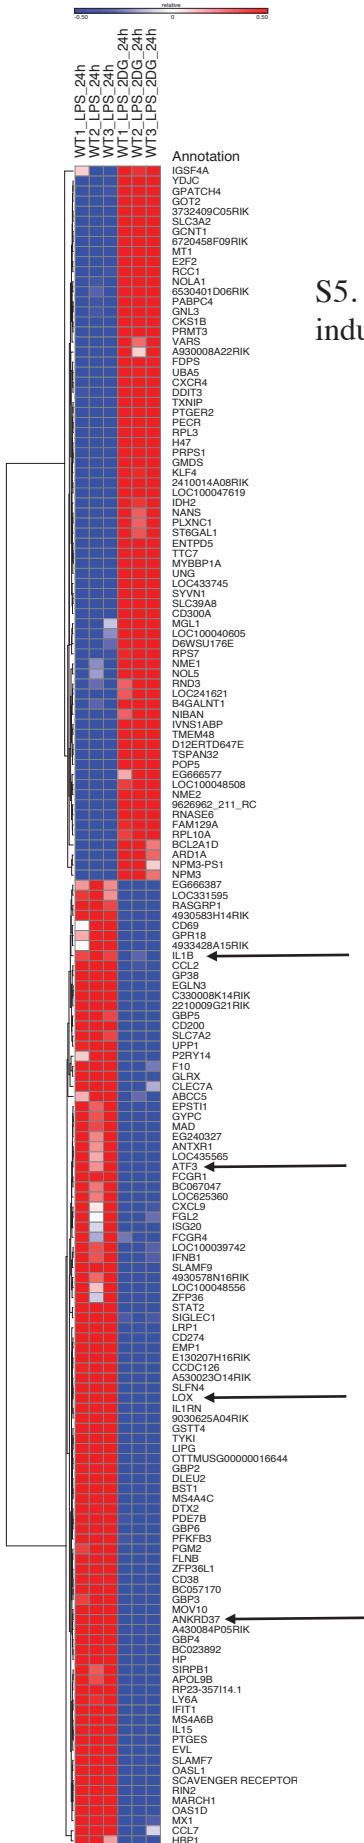

S5. Heat map representing genes regulated at 24 h by LPS that were both induced (red) and repressed (blue) by 2DG in BMDMs. n=3

S6

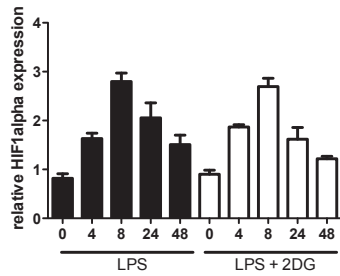

S7

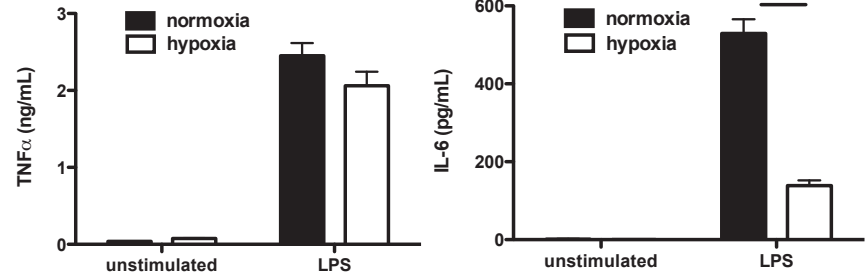

S8

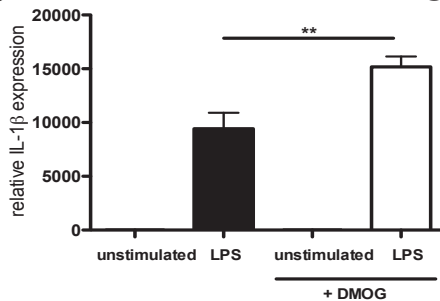

S9

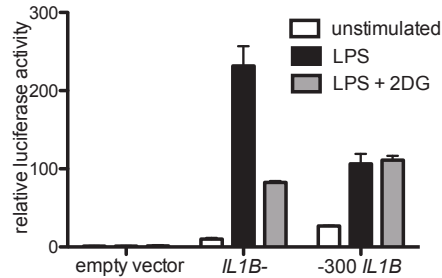

S6. HIF-1α mRNA in LPS-stimulated BMDMs, pretreated ± 2DG. S7. LPS-induced, TNFα (left panel) and IL-6 (right panel) in BMDMs incubated in either normoxia (21% oxygen, black bars) or hypoxia (1% oxygen, white bars) for 24 h and then stimulated with LPS for a further 24 h. S8. IL-1β mRNA levels in LPS-stimulated BMDMs pretreated with DMOG (200μM). Error bars ± s.e.m, \* p < 0.05; \*\* p < 0.01 . S9. RAW-264 cells transfected with the promoter region of human *IL1B* (*IL1B*-) or it's variant (-300 *IL1B*). Promoter activity was measured by luciferase assay as relative expression over the unstimulated empty vector control (mean ±s.d.). Representative of 3 independent experiments

S10

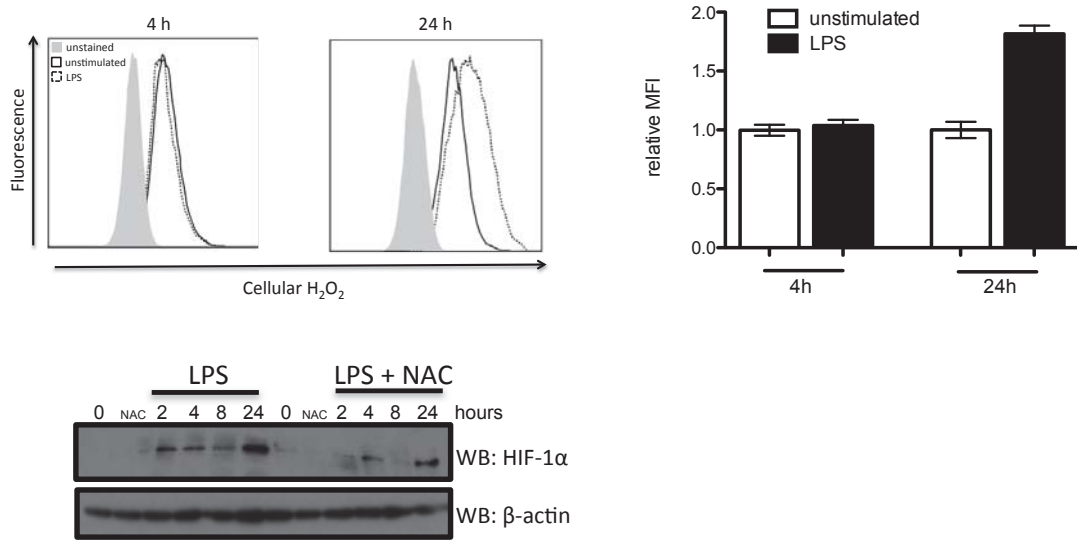

S11

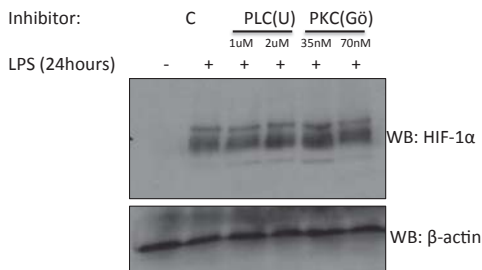

S12

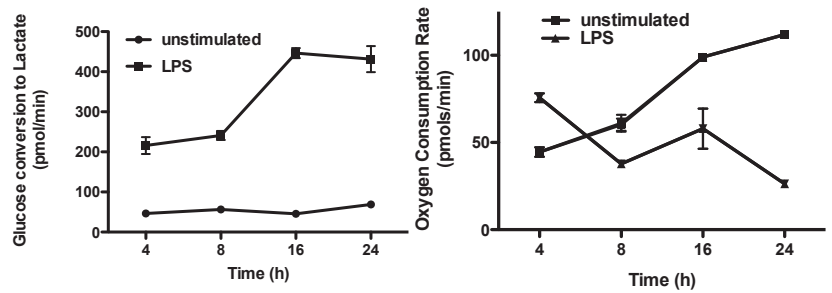

S10. BMDMs stimulated with LPS for 4 and 24 h then stained with CM-H2DCFDA and analysed by fluorescence-activated cell sorting (left panel). Quantification of three separate experiments displayed as relative mean fluorescence intensity (MFI) (right panel). HIF-1α expression in BMDMs pretreated with the antioxidant N-acetyl cysteine (NAC) (2.5mM) then LPS for up to 24 h (lower panel). S11. HIF-1α expression in LPS-stimulated BMDMs pretreated with PLC inhibitor (1 or 2μM) and PKC inhibitor (35 or 70nM). S12. BMDMs stimulated with LPS for 24 h were analysed on the Seahorse XF-24 for ECAR and OCR.



S14

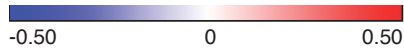

WT1\_LPS\_4h  
 WT2\_LPS\_4h  
 WT3\_LPS\_4h  
 WT1\_LPS\_24h  
 WT2\_LPS\_24h  
 WT3\_LPS\_24h

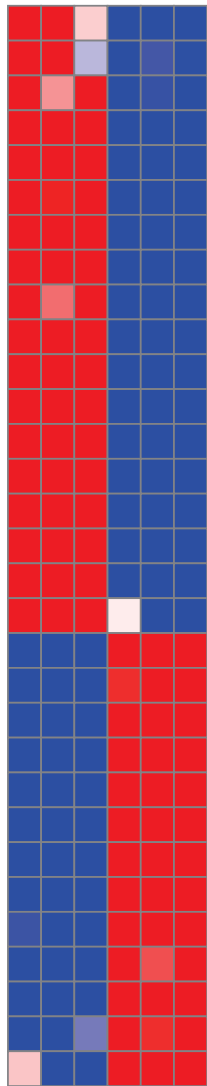

Annotation

SLC11A2  
 NUP155  
 NUP43  
 NUP107  
 GOT2  
 ALDH1B1  
 NUP85  
 AAAS  
 NUP133  
 NUP210  
 IDH2  
 ALDOC  
 SLC39A8  
 SLC39A10  
 SLC2A6  
 NUP205  
 PHKA2  
 MDH1  
 SLC16A10  
 SLC6A12  
 SLC6A13  
 PGM2  
 SLC3A2  
 SLC31A1  
 SLC2A1  
 SLC11A1  
 ENO2  
 ACSS2  
 SLC39A7  
 HK3  
 PFKFB3

S15

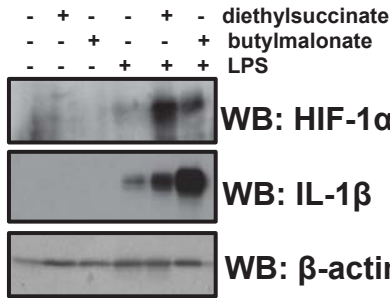

S16

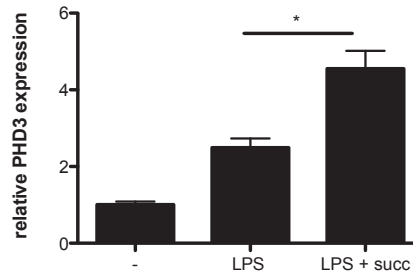

S14. Heat map representing metabolic genes regulated at 4 and 24 h by LPS that were both induced (red) and repressed (blue) in BMDMs. n=3. S15. HIF-1α and IL-1β expression in BMDMs pretreated ± diethylsuccinate (5mM) or ± butylmalonate for 3 h and LPS for 24 h. S16. PHD3 mRNA expression in BMDMs pretreated with diethylsuccinate (succ) (5mM) for 3 h and LPS for 24 h. Error ± s.e.m \* p < 0.05.

S17

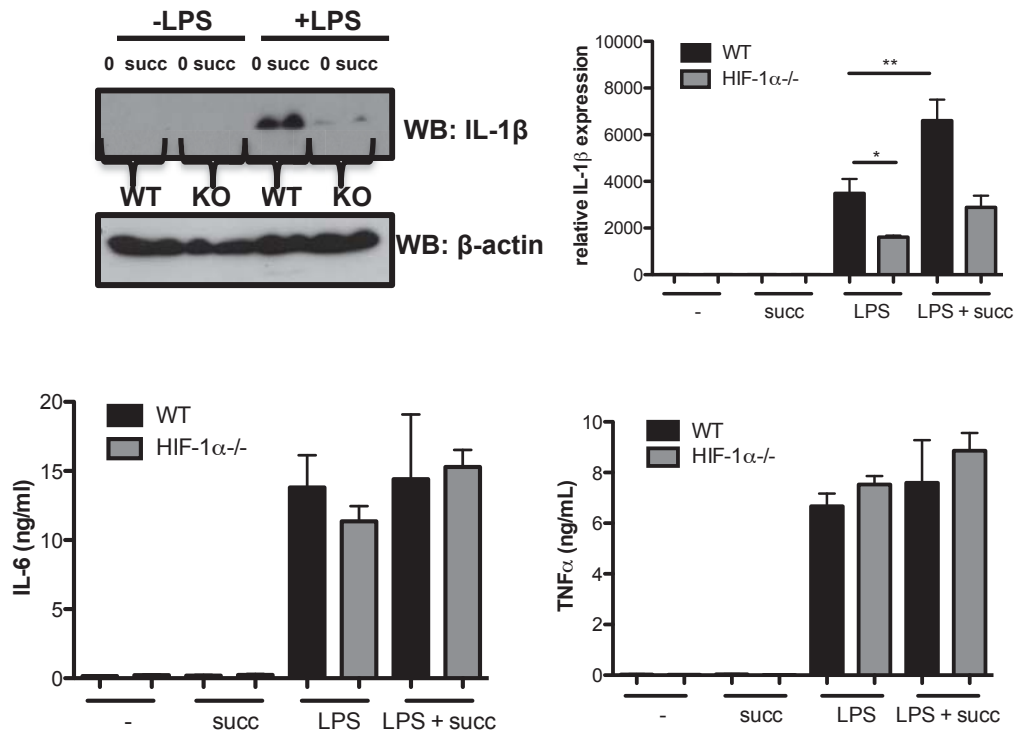

S17. IL-1β protein and mRNA (upper left and right panel) and IL-6 and TNFα (lower left and right panel) expression in WT and HIF-1α-deficient BMDMs treated ± diethyl succinate then LPS stimulated for 24 h. Error bars ± s.e.m, \* p < 0.05; \*\* p < 0.01.

S18

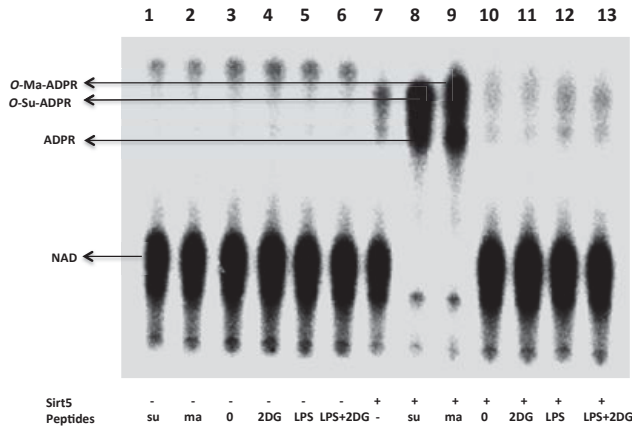

S19

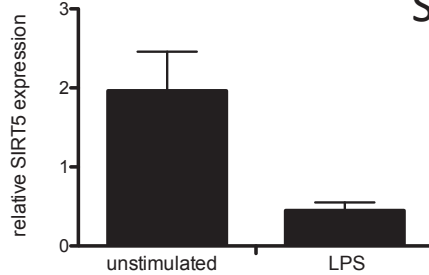

S20

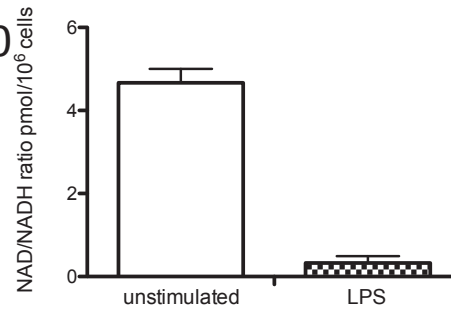

S18.  $^{32}\text{P}$ -NAD assay detecting SIRT5-catalyzed hydrolysis of succinyl and malonyl peptides, which formed  $^{32}\text{P}$ -labeled *O*-Su-ADPR and *O*-Ma-ADPR. Trypsin digested peptides of whole BMDM cell lysates treated with LPS (lane 12) showed higher protein succinylation level compared with control group (lane 10). Synthetic H3K9 succinyl and malonyl peptides were used as positive controls (lane 8 and 9) to indicate the reference positions of *O*-Su-ADPR and *O*-Ma-ADPR. S19. SIRT5 mRNA expression in BMDMs treated with LPS for 4 h. S20. NAD/NADH ratio in BMDMs treated with LPS for 24 h.



S21

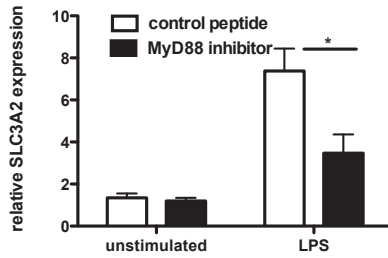

S22

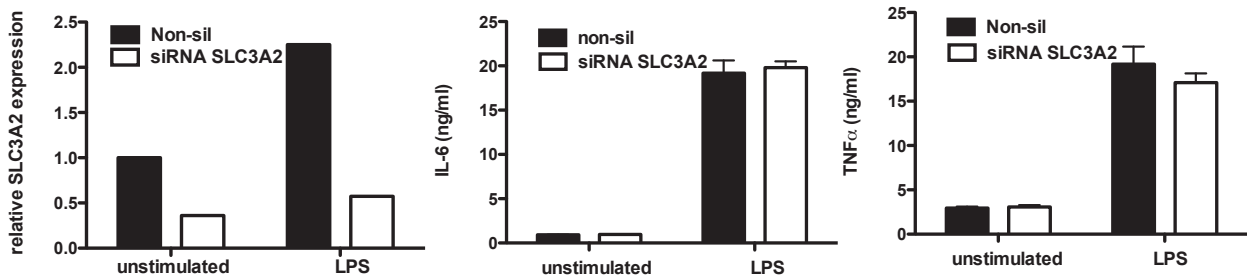

S23

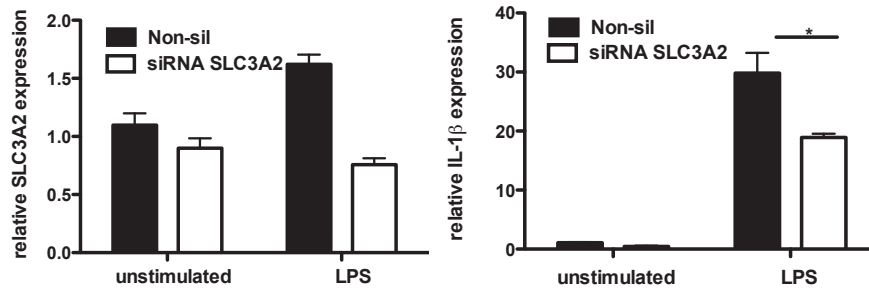

S21. SLC3A2 mRNA in LPS stimulated BMDMs pretreated with control peptide (5 $\mu$ M) or MyD88 inhibitory peptide (5 $\mu$ M) for 5 h. S22. SLC3A2 mRNA, IL-6 and TNF $\alpha$  protein in human PBMCs with SLC3A2 expression knocked down using 100nM siRNA compared to 100nM siRNA of a non-silencing control. Data shown is representative of 3 separate experiments Error bars,  $\pm$ s.d. S23. SLC3A2 and IL-1 $\beta$  mRNA expression in RAW-264 cells transfected with either 100nM siRNA or 100nM siRNA of a non-silencing control. n=3. Error bars  $\pm$  s.e.m, \* p < 0.05.

S24

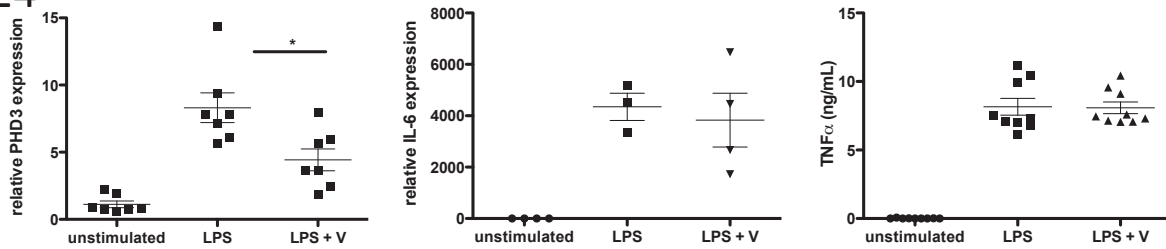

S25

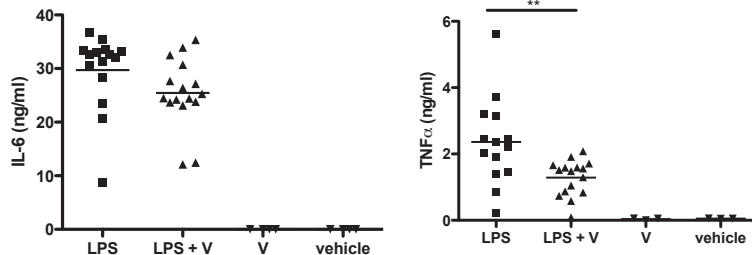

S26

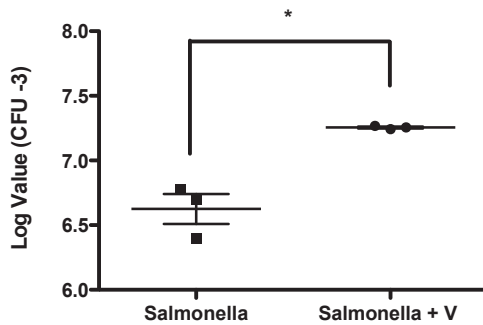

S24. PHD3 mRNA (n=7), TNF $\alpha$  protein (n=9) and IL-6 mRNA (n=4) in serum-deprived LPS-stimulated BMDMs pretreated  $\pm$  vigabatrin (500 $\mu$ M) for 30 min. S25. Mice i.p. injected  $\pm$  vigabatrin (400mg/kg) or PBS for 1.5 h, then 15 mg/kg LPS or PBS for 1.5 h. Serum levels of IL-6 and TNF $\alpha$ . LPS n=16; LPS+vigabatrin (LPS + V) n=14; vigabatrin (V) n=3; vehicle n=3. S26. Mice i.p. injected mice  $\pm$  vigabatrin (400mg/kg) or PBS for 1.5 h then infected with  $1 \times 10^6$  *Salmonella* Typhimurium UK1 i.p. for 2 h. Spleens were harvested, homogenised in PBS and following serial dilution plated onto agar plates and left at 37°C overnight, bacterial load was assessed by colony forming units (CFU). Error bars  $\pm$  s.e.m, \* p < 0.05; \*\* p < 0.01.
